# Supplementary material for: Ecophysiological modeling of photosynthesis and carbon allocation to the tree stem in the boreal forest
Source: Copernicus journal article supplement (doi:10.5194/bg-14-4851-2017), 2017-11-06
Supplement: Supplementary file 2 [file bg-14-4851-2017-supplement.zip]

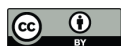

*Supplement of*

**Ecophysiological modeling of photosynthesis and carbon allocation  
to the tree stem in the boreal forest**

**Fabio Gennaretti et al.**

*Correspondence to:* Fabio Gennaretti ([fabio.gennaretti@inra.fr](mailto:fabio.gennaretti@inra.fr))

- [bg-14-4851-2017-supplement-title-page.pdf](#)
- [Dataset-S01.csv](#)
- [Gennaretti\\_et\\_al\\_Supplements.pdf](#)

The copyright of individual parts of the supplement might differ from the CC BY 3.0 License.
